# Supplementary material
Source: ML conference proceedings conference paper supplement (https://www.ecva.net/papers/eccv_2024/papers_ECCV/html/1558_ECCV_2024_paper.php)
Supplement: Supplementary file 1 [file 01558-supp.pdf]

## Appendix

**Datasets.** Tab. 1, Tab. 2 and Tab. 3 provide a brief introduction to the datasets used for tasks referring expression comprehension, image classification and 3D cloud recognition, respectively.

**Table 1:** Referring expression comprehension datasets. “Refs” means the number of referring expressions.

|        | RefCOCO |       |       | RefCOCO+ |       |       | RefCOCOg |       |
|--------|---------|-------|-------|----------|-------|-------|----------|-------|
|        | TestA   | TestB | Val   | TestA    | TestB | Val   | Test     | Val   |
| Images | 750     | 750   | 1,500 | 750      | 750   | 1,500 | 2,600    | 1,300 |
| Refs   | 1,975   | 1,810 | 3,811 | 1,975    | 1,798 | 3,805 | 5,023    | 2,573 |

**Table 2:** Image Classification datasets. “Images used” means the number of images used in our experiments.

|              | StanfordDogs | CUB-200-2011 | ImageNet-S | Waterbirds |
|--------------|--------------|--------------|------------|------------|
| Categories   | 120          | 200          | 919        | 2          |
| Total Images | 20,580       | 11,788       | 1,223,164  | 20,580     |
| Images used  | 20,580       | 11,788       | 12,419     | 5,794      |

**Table 3:** 3D cloud recognition datasets. “Clouds used” means the number of clouds used in our experiments.

|              | ModelNet40 | ScanObjectNN |
|--------------|------------|--------------|
| Categories   | 40         | 15           |
| Total Clouds | 12,311     | 2,880        |
| Clouds used  | 2,468      | 576          |

**Referring Expression Comprehension.** Tab. 4 and Tab. 5 present detailed experimental results about  $\alpha$  and  $\sigma$ , respectively. We take  $\alpha = 0.2$  and  $\sigma = 100$  in final result. Fig. 1 illustrates the visual impact of different  $\alpha$  and  $\sigma$  on the original image. To investigate the sensitivity of different layers in CLIP to masks, we insert masks at various layers and present results in Tab. 6. We find that inserting masks only in the last 4 layers results in the highest model accuracy, which suggests that the attention computations in the later layers play a decisive role in shaping the representation of the model’s output, while the initial layers seem to have a minor impact on the results. Fig. 4 depicts the details of the ensemble and Fig. 5 shows the extensive results of referring expression comprehension.

**Table 4:** Ablation on  $\alpha$ . The best results are in **bold**.

| $\alpha$ | RefCOCO     |             |             | RefCOCO+    |             |             | RefCOCOg    |             | Avg         |
|----------|-------------|-------------|-------------|-------------|-------------|-------------|-------------|-------------|-------------|
|          | TestA       | TestB       | Val         | TestA       | TestB       | Val         | Test        | Val         |             |
| 0.05     | 39.9        | 37.5        | 38.0        | 42.8        | 41.2        | 41.3        | 49.1        | 48.8        | 42.3        |
| 0.1      | 42.9        | 39.3        | 40.5        | 45.9        | 43.3        | 43.9        | 50.8        | 50.4        | 44.6        |
| 0.2      | <b>44.2</b> | 39.4        | 40.8        | <b>46.8</b> | 43.1        | <b>44.5</b> | <b>51.5</b> | <b>51.3</b> | <b>45.2</b> |
| 0.3      | 43.4        | 39.3        | <b>41.3</b> | 46.5        | <b>43.7</b> | 44.5        | 51.3        | 51.1        | 45.1        |
| 0.4      | 43.3        | 39.4        | 41.2        | 46.1        | 43.2        | 44.2        | 51.0        | 51.1        | 44.9        |
| 0.5      | 43.0        | <b>39.9</b> | 40.5        | 45.6        | 43.3        | 44.0        | 51.0        | 51.0        | 44.8        |
| 0.6      | 42.7        | 39.8        | 40.8        | 45.3        | 43.5        | 44.0        | 50.5        | 50.7        | 44.7        |

**Table 5:** Ablation on  $\sigma$ . The best results are in **bold**.

| $\sigma$ | RefCOCO     |             |             | RefCOCO+    |             |             | RefCOCOg    |             | Avg         |
|----------|-------------|-------------|-------------|-------------|-------------|-------------|-------------|-------------|-------------|
|          | TestA       | TestB       | Val         | TestA       | TestB       | Val         | Test        | Val         |             |
| 1        | 35.0        | 38.1        | 35.1        | 38.2        | 40.6        | 38.4        | 45.3        | 45.2        | 39.5        |
| 100      | <b>44.2</b> | 39.4        | <b>40.8</b> | <b>46.8</b> | 43.1        | <b>44.5</b> | <b>51.5</b> | <b>51.3</b> | <b>45.2</b> |
| 200      | 43.5        | 39.7        | 40.8        | 46.3        | 43.2        | 44.3        | 51.3        | 51.1        | 45.0        |
| 300      | 43.5        | 39.5        | 40.8        | 45.9        | <b>43.6</b> | 44.2        | 51.0        | 50.8        | 44.9        |
| 400      | 43.6        | 39.5        | 40.8        | 46.0        | 43.4        | 43.8        | 50.8        | 50.9        | 44.9        |
| 500      | 42.8        | 39.5        | 40.4        | 45.2        | 42.9        | 43.7        | 51.0        | 50.4        | 44.5        |
| 600      | 43.2        | <b>39.8</b> | 40.2        | 45.1        | 43.1        | 43.6        | 50.5        | 50.9        | 44.5        |

**Image Classification.** The image classification experimental results are obtained from testing on the following datasets: entire StanfordDogs, entire CUB-200-2011, test of Waterbirds and validation of ImageNets, which are shown in Tab. 2. Fig. 2 shows the input image of various methods. Tab. 7 demonstrates the performance of FALIP on the larger model Vit-L/14, showing an improvement over CLIP in terms of accuracy. Except for the Waterbirds, FALIP achieves the highest accuracy on all other datasets. Tab. 8 illustrates how accuracy is affected by visual prompt of varying sizes. Increasing the range of the RedCircle

**Table 6:** Effect of which layer to insert masks. “1~4” means layers 1 to 4 are inserted a mask. “9~12” achieves highest performance. The attention in the later layers have a significant impact on shaping the output embedding. The best results are in **bold**.

| Layer | RefCOCO     |             |             | RefCOCO+    |             |             | RefCOCOg    |             | Avg         |
|-------|-------------|-------------|-------------|-------------|-------------|-------------|-------------|-------------|-------------|
|       | TestA       | TestB       | Val         | TestA       | TestB       | Val         | Test        | Val         |             |
| 1     | 17.1        | 25.8        | 20.6        | 17.3        | 26.8        | 20.6        | 24.6        | 26.8        | 22.4        |
| 1~4   | 20.4        | 26.1        | 21.0        | 21.0        | 27.1        | 21.7        | 27.6        | 27.3        | 24.0        |
| 1~6   | 22.3        | 25.1        | 22.4        | 22.1        | 25.7        | 23.6        | 28.6        | 28.2        | 24.7        |
| 12    | 39.4        | <b>40.0</b> | 39.7        | 43.7        | <b>43.8</b> | 42.9        | 50.9        | 50.6        | 43.9        |
| 9~12  | <b>44.2</b> | 39.4        | 40.8        | <b>46.8</b> | 43.1        | <b>44.5</b> | <b>51.5</b> | <b>51.3</b> | <b>45.2</b> |
| 7~12  | 43.8        | 39.4        | <b>41.3</b> | 46.3        | 42.5        | 44.2        | 51.0        | 51.1        | 44.9        |

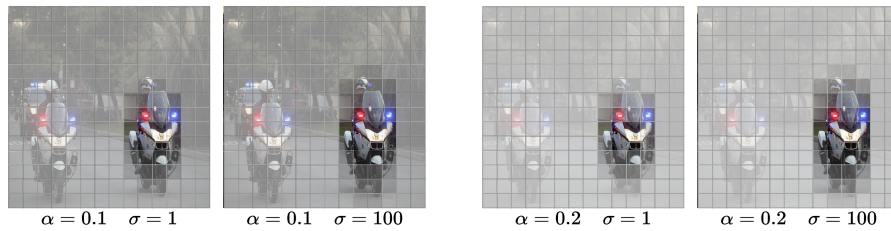

**Fig. 1:** Visualizing different values of  $\alpha$  and  $\sigma$  on the original image. A large  $\alpha$  enhance prominence of the specific region and a large  $\sigma$  preserve more content within the region.

appropriately can lead to a certain improvement in accuracy. Fig. 4 provides a brief explanation of enlarging size of visual prompt (the maximum size will not exceed the inscribed circle of the image). In Fig. 6 we compare our method with CLIP on the model’s attention.

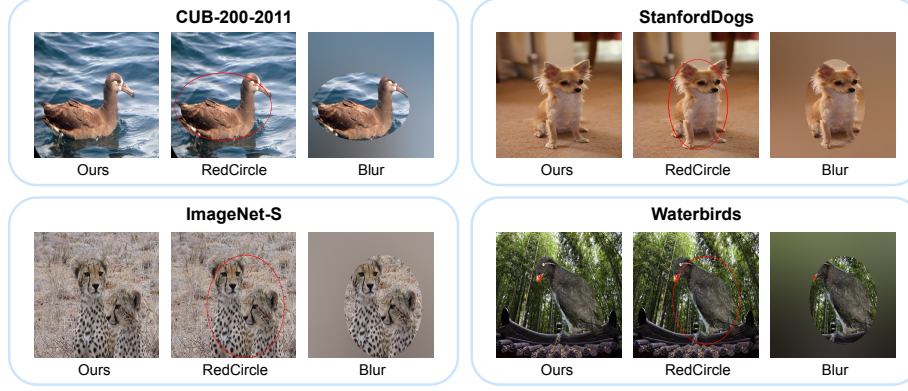

**Fig. 2:** Examples of input images in each dataset. For each dataset, from the left to right is the input image of model for our method, RedCircle and Blur respectively.

**Table 7:** Method ablation on Image Classification. The best results are in **bold**, and sub-optimal results are underlined.

| Method        | Model | StanfordDogs |             | CUB-200-2011 |             | ImageNet-S  |             | Waterbirds  |
|---------------|-------|--------------|-------------|--------------|-------------|-------------|-------------|-------------|
|               |       | Top1         | Top5        | Top1         | Top5        | Top1        | Top5        |             |
| Original CLIP | ViT-B | <u>56.5</u>  | <u>85.2</u> | <u>54.2</u>  | <b>83.7</b> | <u>64.9</u> | <u>88.4</u> | <u>78.2</u> |
| RedCircle     | ViT-B | 52.4         | 82.8        | 44.2         | 77.0        | 62.8        | 86.5        | 77.5        |
| Blur          | ViT-B | 51.9         | 81.9        | 39.1         | 71.0        | 53.8        | 77.6        | 78.1        |
| FALIP(Ours)   | ViT-B | <b>58.3</b>  | <b>86.0</b> | <b>54.3</b>  | <u>83.6</u> | <b>67.3</b> | <b>89.9</b> | <b>79.7</b> |
| Original CLIP | ViT-L | <u>65.4</u>  | <u>89.1</u> | <u>61.4</u>  | <u>90.1</u> | <u>72.0</u> | <u>91.1</u> | 83.3        |
| RedCircle     | ViT-L | 63.7         | 88.6        | 56.1         | 87.5        | 70.9        | 90.6        | 80.7        |
| Blur          | ViT-L | 60.1         | 85.4        | 46.1         | 82.8        | 63.6        | 84.2        | <b>85.1</b> |
| FALIP(Ours)   | ViT-L | <b>66.6</b>  | <b>89.8</b> | <b>61.7</b>  | <b>90.7</b> | <b>74.8</b> | <b>92.7</b> | <u>84.5</u> |

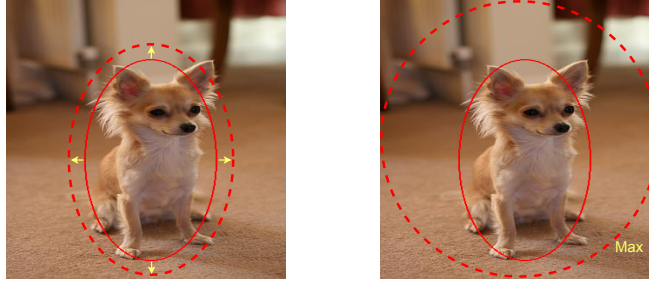

**Fig. 3:** Enlarge prompts. We increase the pixels in four directions. In this way, the contamination of foreground can be mitigated.



**Table 8:** Method ablation on size of RedCircle. The best results are in **bold**.

| Enlarge Pixels | StanfordDogs |             | CUB-200-2011 |             | ImageNet-S  |             | Waterbirds  |
|----------------|--------------|-------------|--------------|-------------|-------------|-------------|-------------|
|                | Top1         | Top5        | Top1         | Top5        | Top1        | Top5        | Top1        |
| 0              | 52.4         | 82.8        | 44.2         | 77.0        | 62.8        | 86.5        | 77.5        |
| 5              | 51.8         | 81.8        | 43.2         | 76.0        | 63.2        | 87.2        | 77.6        |
| 10             | 52.4         | 82.1        | 43.8         | 76.4        | 63.6        | 87.3        | 77.7        |
| 20             | 52.7         | 82.4        | 45.6         | 77.3        | <b>64.3</b> | 87.7        | 78.0        |
| 30             | 53.1         | 82.4        | 46.5         | 78.0        | 64.2        | <b>88.1</b> | 78.4        |
| 40             | <b>53.2</b>  | 82.6        | 47.1         | 78.6        | 64.1        | 87.9        | 78.7        |
| 50             | 53.0         | <b>82.7</b> | 46.9         | 78.8        | 63.9        | 87.6        | 78.7        |
| 100            | 52.9         | 82.5        | 47.6         | <b>79.0</b> | 62.6        | 86.7        | 78.6        |
| 150            | 52.8         | 82.4        | 47.7         | 78.7        | 61.8        | 86.6        | 78.7        |
| 200            | 52.8         | 82.4        | <b>47.8</b>  | 78.9        | 61.7        | 86.2        | <b>78.7</b> |

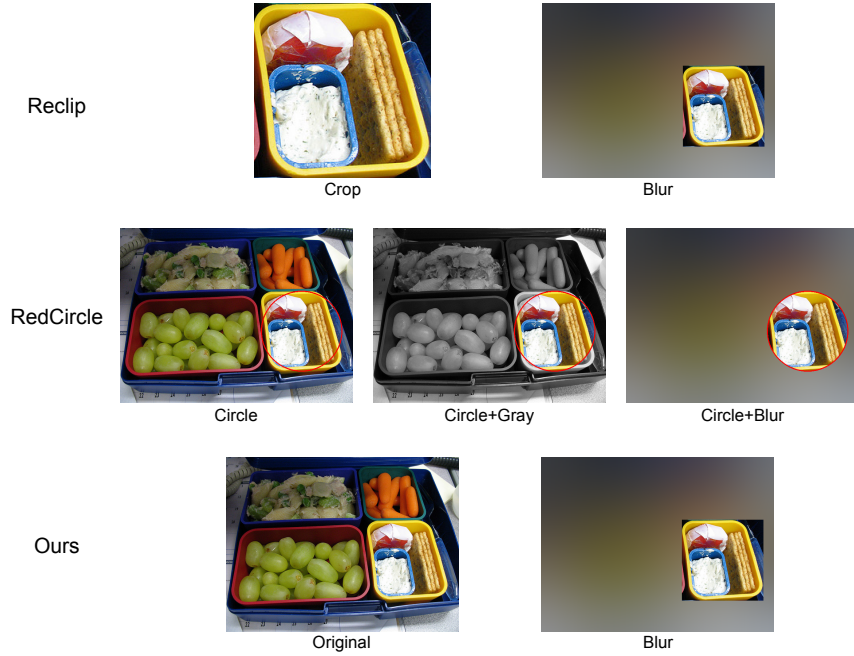**Fig. 4:** The specific approaches for ensemble. To ensure a fair comparison, we also adopt the same Blur method used in the previous method.

**Pesudo Code.** The pesudo code of FALIP is shown in **Algorithm 1**.

---

**Algorithm 1** Image Encoder of Foveal-Attention CLIP

---

**Input:** image  $x$ , bounding box  $box$

**Output:** image feature  $f_v$

```

1: function FALIP( $x, box$ )
2:    $x^* \leftarrow \text{Preprocess}(x)$ 
3:    $X \leftarrow \text{PatchEmbedding}(x^*)$       #Transform image to sequence,  $X \in \mathbb{R}^{(N+1) \times D}$ 
4:    $T \leftarrow \text{BoxToToken}(x, box)$     #Transform box to token space
5:    $H, W \leftarrow T.height, T.width$ 
6:    $R \leftarrow \mathbf{0}^{H \times W}$                 #Initialize with 0
7:    $M \leftarrow \mathbf{0}^{(N+1) \times (N+1)}$       #Initialize with 0,  $N + 1$  is length of the sequence
8:   for  $i = 0$  to  $(H - 1)$  do
9:     for  $j = 0$  to  $(W - 1)$  do
10:       $R[i][j] \leftarrow e^{-\frac{[i-(H-1)/2]^2 + [j-(W-1)/2]^2}{2\sigma^2}}$     #Generate foveal value
11:    end for
12:  end for
13:   $R^{norm} \leftarrow \alpha \times \frac{R - \text{Min}(R) + \epsilon}{\text{Max}(R) - \text{Min}(R) + \epsilon}$     #Normalization
14:   $R^* \leftarrow \text{Flatten}(R^{norm})$     #Flatten and align indices with  $X$ 
15:   $M[0] \leftarrow R^*$                 #Assgin value to positions in the first row of  $M$ 
16:   $X^* \leftarrow \text{LayerNorm}(X)$ 
17:   $f_v \leftarrow \text{Transformer}(X^*, M)$     #Input sequence and foveal attention mask
18: end function

```

---

| Referring Expression                        | Prediction                                                                          | Referring Expression           | Prediction                                                                          | Referring Expression               | Prediction                                                                            |
|---------------------------------------------|-------------------------------------------------------------------------------------|--------------------------------|-------------------------------------------------------------------------------------|------------------------------------|---------------------------------------------------------------------------------------|
| Red tie and sunglasses man                  |    | Woman with short hair          |    | Tall oj                            |    |
| 51                                          |    | Guy looking down at phone      |    | Smallest lamb                      |    |
| Sandwich showing what's inside the sandwich |    | Giraffe with his neck straight |    | White wine in glass                |    |
| Heart shaped food                           |    | The bus closest to the flag    |    | A man changing a tire              |    |
| Part of sandwich not close to drink         |   | Person in pink and red coat    |   | Large blurry orange                |   |
| Girl looking at cake                        |  | Part of elephant on far left   |  | Man sitting in the back            |  |
| Person barely visible by the white door     |  | Right most man                 |  | Briefcase dog is touching          |  |
| Bird nearest us                             |  | Winnie the pooh                |  | Brown beer in front with green tie |  |
| Wood chair front left corner                |  | Empty chair right              |  | Wittgenstein                       |  |
| Man in blue 2nd from right                  |  | Round all white clock          |  | Close big umbrella                 |  |

**Fig. 5:** The visualization results of REC. The keywords are highlighted in orange.

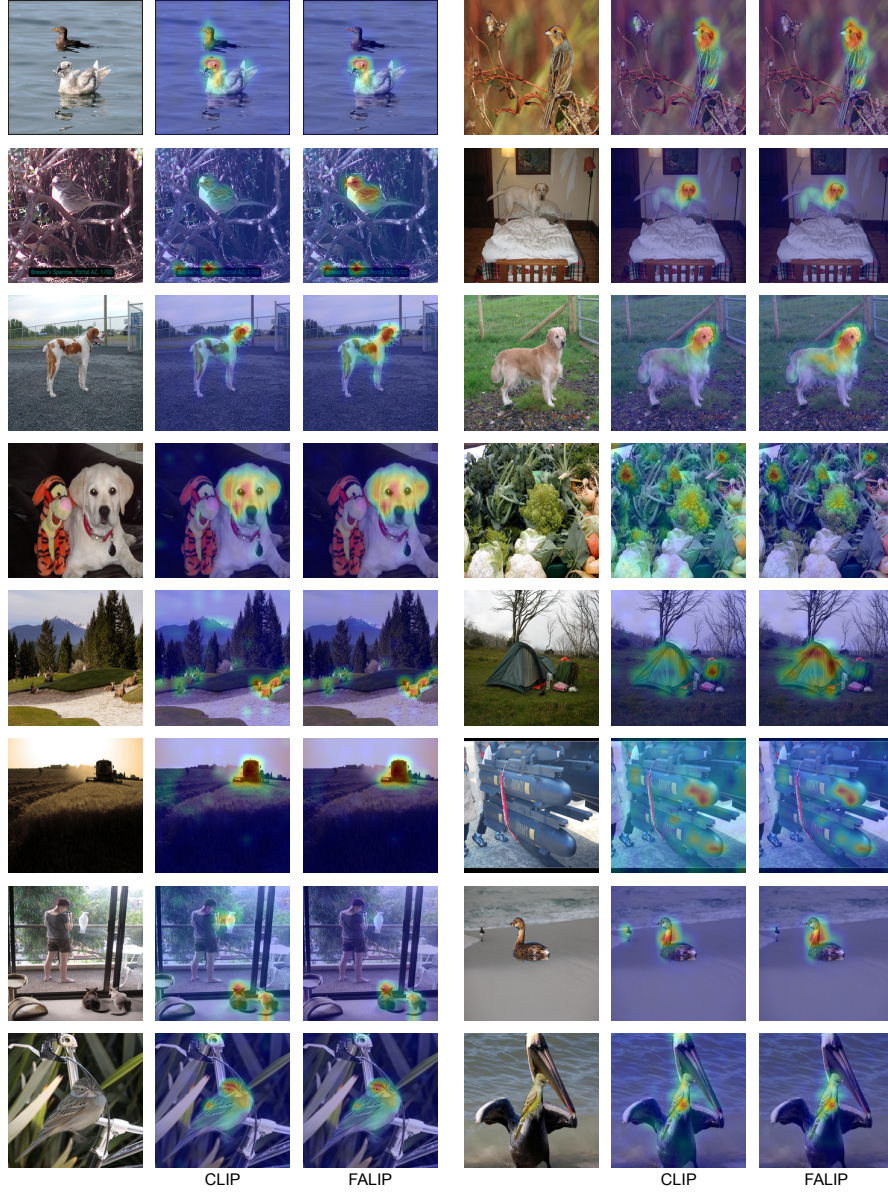

**Fig. 6:** Attention visualization. Our model demonstrates its ability to better focus on the target objects rather than irrelevant objects in the background.
